# Supplementary material
Source: PubMed Central journal article supplement (PMC5033818)

## Supplementary Figure Legends

### **Supplementary Figure S1. Cyld is expressed in mouse skin and hair follicles.**

Frozen tissue sections of newborn and 1-month old mice back skin were immunostained with a rabbit anti-Cyld antibody (Ab-H419, Santa Cruz Biotechnology) followed by detection with a donkey anti-rabbit secondary antibody conjugated with Alexa-555 [orange]. Nuclei [blue, Hoechst 32258]. Scale bars: 100  $\mu$ m.

### **Supplementary Figure S2. K14-Cre mediated knock-in expression of Cyld<sup>m</sup> in mice.**

**(A)** Schematic representation of *Cyld*<sup>flx</sup> allele and Cre-recombined *Cyld*<sup>E49</sup> allele and the location of the primers used for genotyping by PCR and RT-PCR. **(B-C)** Confirmation of K14-Cre-mediated deletion of *Cyld* exon 9 by PCR and RT-PCR with genomic DNA and total RNA isolated from epidermal cells. PCR-amplified DNA and cDNA were analyzed on 1.2% agarose gel. **(D)** Immunoblotting of mouse skin extracts with antibodies against Cyld (Ab-H419) and Actin (SC1616, Santa Cruz Biotechnology). **(E)** Immunoblotting of mouse skin extracts with antibodies against pI $\kappa$ B $\alpha$ (S32) and pc-Jun(S73) (#2859 and #9164, Cell Signaling Technology), I $\kappa$ B $\alpha$  and Actin (SC847 and SC1616, Santa Cruz Biotechnology).

**Supplementary Figure S3. Hair defects of *Cyld*<sup>E49/49</sup> mice.** **(A)** Normal representation of different hair types. A total of 300-400 hairs were counted from 3 mice of each genotype. Graph represents the percentages of each hair type +/- SD. **(B)** Microscopic images of each hair type. Note the reduced thickness of *Cyld*<sup>E49/49</sup> hairs.

**Supplementary Figure S4. Sebaceous gland hyperplasia in adult in *Cyld*<sup>E49/49</sup> mice skin.** **(A-B)** H&E staining of back skin tissues from newborn and 18-day old mice. **(C)**

Oil red staining of epidermal whole mount of the tail skin. Tail skin pieces of 1-month old mice were treated with dispase overnight at 4 °C to separate epidermis from dermis. The epidermal sheets were stained with 0.18% oil red in PBS. **(D)** H&E staining of eyelid tissue sections of 1-month old mice. **(E)** Oil red staining of an eyelid skin section. Arrowheads mark sebaceous glands. Scale bars: 50 µm.

**Supplementary Figure S5. TPA-treatment enhances epidermal and sebaceous gland hyperplasia in *Cyld*<sup>E49/Δ9</sup> mice.** The back skin of WT, *Cyld*<sup>E49/+</sup> and *Cyld*<sup>E49/Δ9</sup> mice (n=3) were treated with TPA twice weekly for 2 weeks. Skin tissues were collected for H&E staining. Scale bar: 40 µm.

**Supplementary Figure S6. Tumors induced on *Cyld*<sup>E49/Δ9</sup> and control mice are highly proliferative.** Immunostaining of the frozen tissue sections of tumors developed on WT, *Cyld*<sup>E49/+</sup> and *Cyld*<sup>E49/Δ9</sup> mice with primary antibodies against **(A)** Ki-67 (SP6, ThermoFisher Scientific) and **(B)** cleaved caspase 3 (C. caspase 3) (D175, Cell Signaling Technology). Ki-67 and C. caspase 3 [orange]; Nuclei [blue, Hoechst 32258]. Scale bar: 100 µm.

**Supplementary Figure S7. Tumors induced on *Cyld*<sup>E49/Δ9</sup> and control mice express epithelial cell markers.** Immunostaining of the frozen tissue sections of tumors developed on WT, *Cyld*<sup>E49/+</sup> and *Cyld*<sup>E49/Δ9</sup> mice with primary antibodies against **(A)** cytokeratin 5 (K5) (PRB-160P, Covance), **(B)** cytokeratin 17 (K17) (AB53707, Abcam) and **(C)** E-cadherin (24E10, Cell Signaling Technology). K5, K17 and E-cadherin [orange]; Nuclei [blue, Hoechst 32258]. Scale bar: 100 µm.

**Supplementary Figure S8. Expression of CDK4,  $\beta$ -catenin and Gli1 in tumors**

**induced on *Cyld*<sup>E49/ $\Delta$ 9</sup> and control mice.** Immunostaining of the frozen tissue sections of tumors developed on WT, *Cyld*<sup>E49/+</sup> and *Cyld*<sup>E49/ $\Delta$ 9</sup> mice with primary antibodies against **(A)**  $\beta$ -catenin (A00407, Genscript), **(B-C)** CDK4 and Gli1 (SC260 and SC20687, Santa Cruz Biotechnology).  $\beta$ -catenin, CDK4 and Gli1 [orange]; Nuclei [blue, Hoechst 32258]. Scale bar: 100  $\mu$ m.

**Supplementary Figure S9. Expression of  $\beta$ -catenin and CDK4 in WT and *Cyld* mutant mouse skin.** **(A-B)** Immunostaining of 3-month old adult back skin sections with primary antibodies against (A)  $\beta$ -catenin and (B) CDK4.  $\beta$ -catenin and CDK4 [orange]; Nuclei [blue, Hoechst 32258]. Scale bar: 100  $\mu$ m. Asterisks mark hair follicles and sebaceous glands. CDK4 appeared increased in sebaceous glands of *Cyld*<sup>E49/ $\Delta$ 9</sup> skin.

**Supplementary Figure S1. Cyld is expressed in mouse skin and hair follicles.**

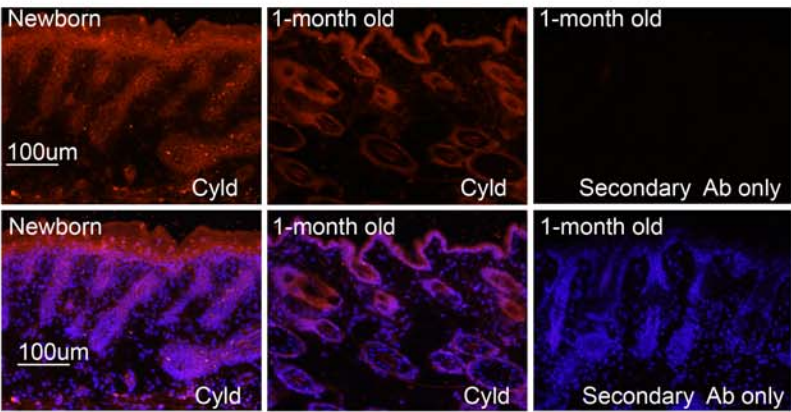

**Supplementary Figure S2. K14-Cre mediated knock-in expression of *Cyld<sup>m</sup>* in mice.**

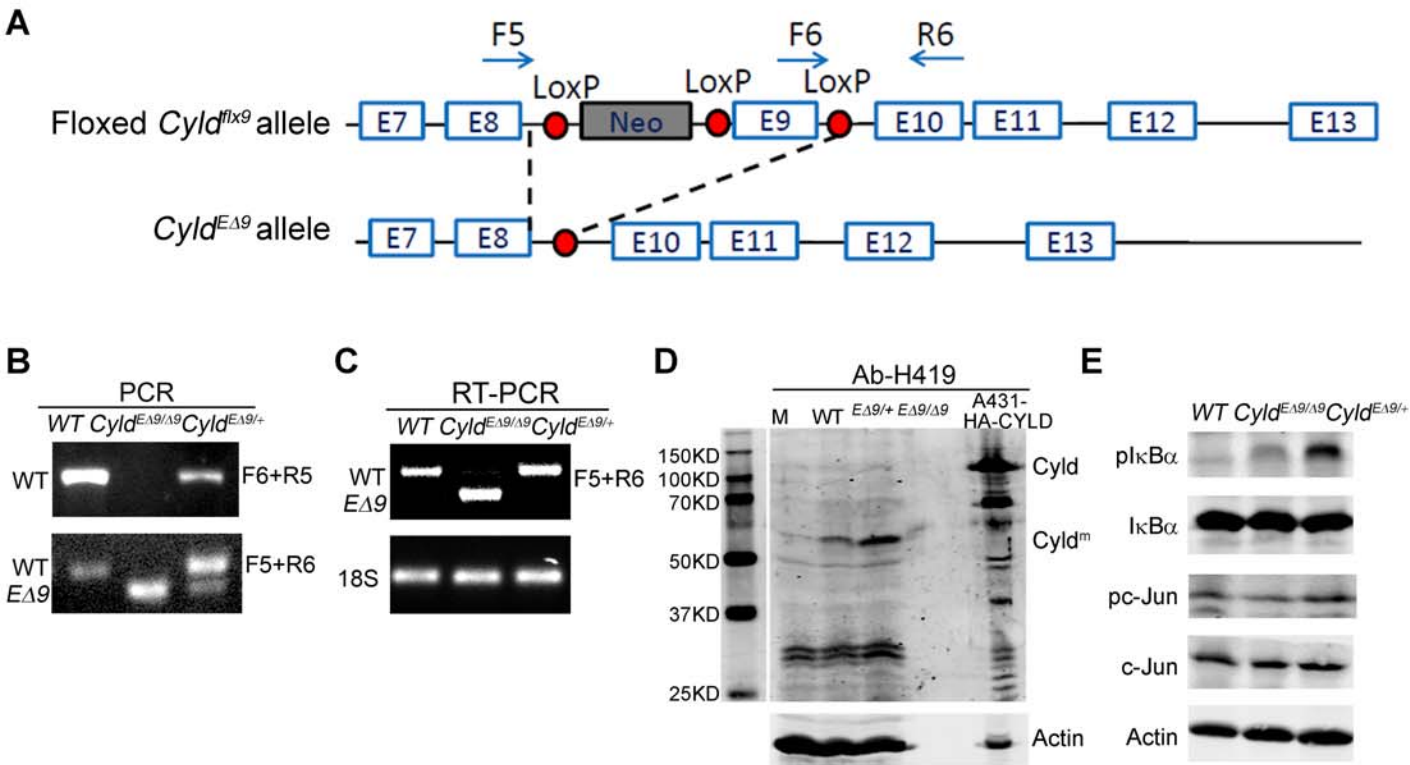

**Supplementary Figure S3. Hair defects of *Cyld<sup>EΔ9/Δ9</sup>* animals.**

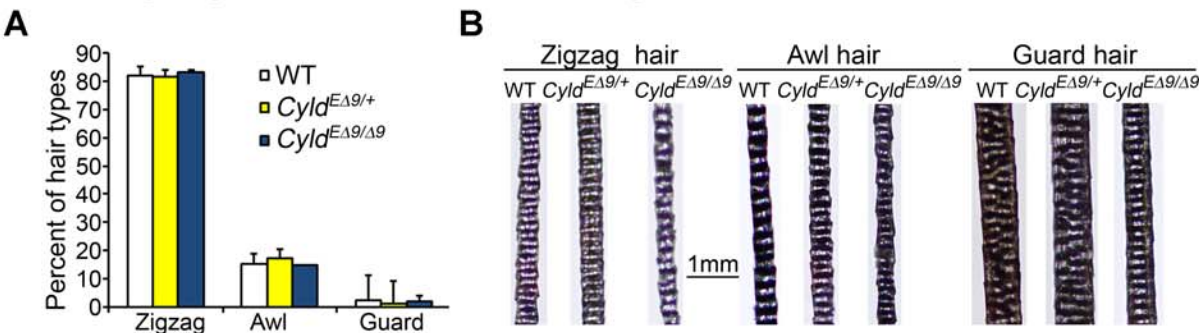

**Supplementary Figure S4. Sebaceous gland hyperplasia in adult *Cyld*<sup>EΔ9/Δ9</sup> animals.**

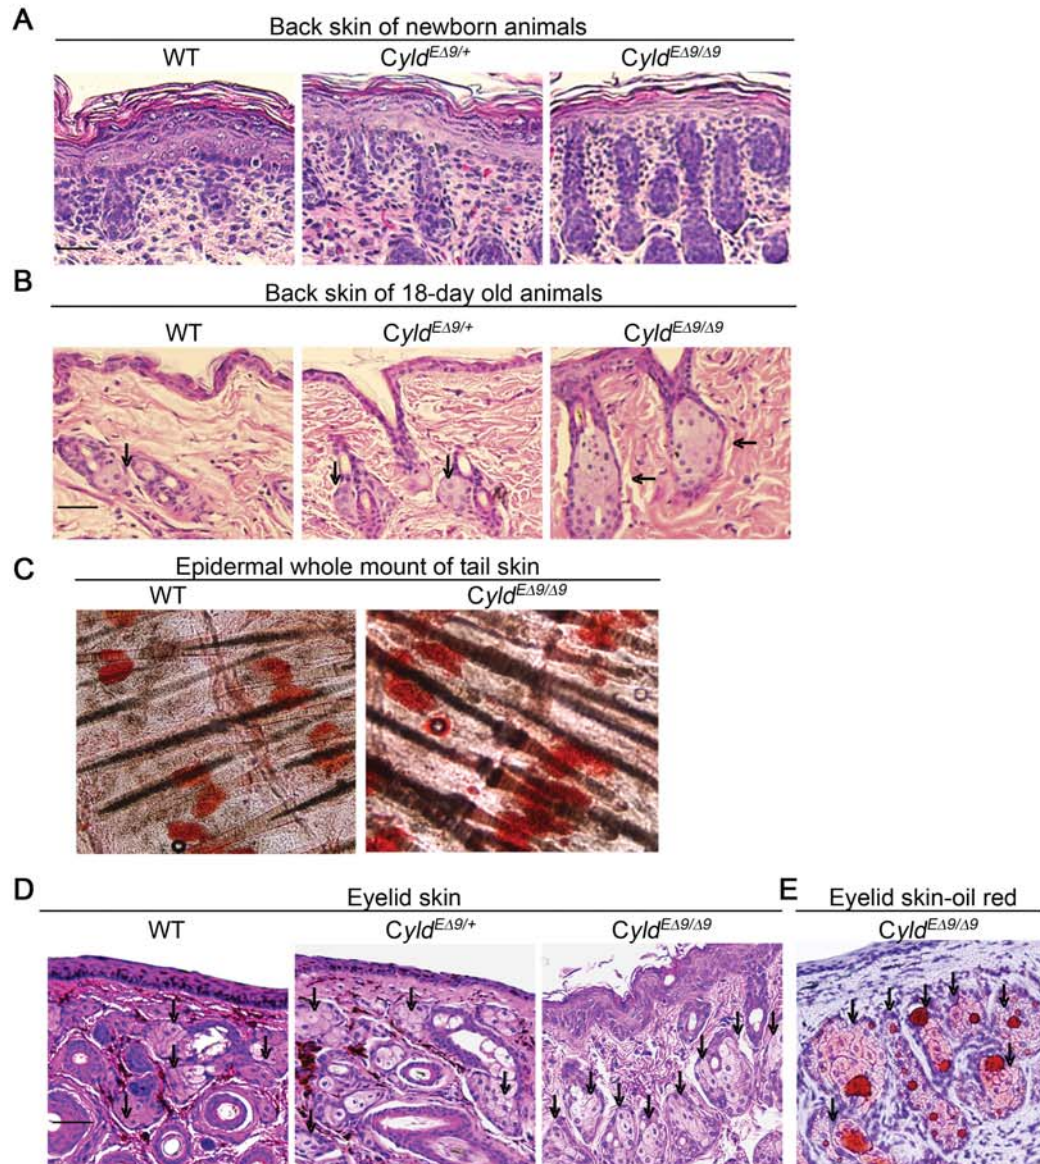

**Supplementary Figure S5. TPA-treatment enhances sebaceous gland and epidermal hyperplasia in *Cyld*<sup>EΔ9/Δ9</sup> mice.**

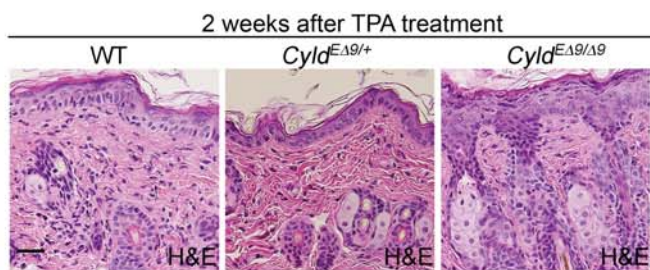

**Supplementary Figure S6. Tumors induced on *Cyld*<sup>EΔ9Δ9</sup> and control mice are highly proliferative.**

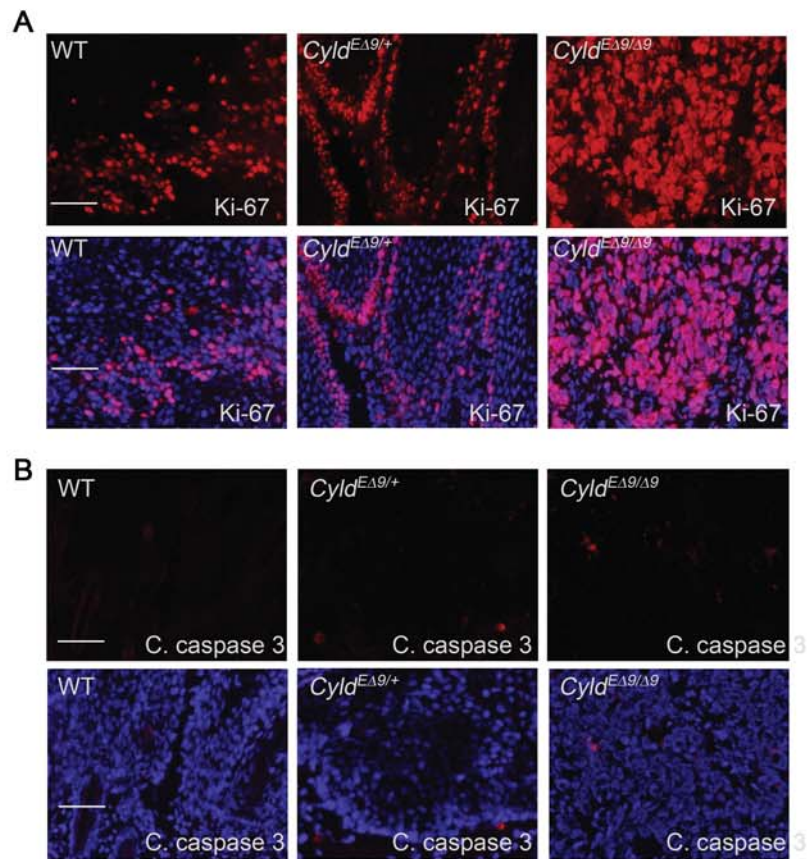

**Supplementary Figure S7. Tumors induced on *Cyld*<sup>EΔ9/Δ9</sup> and control mice express epithelial cell markers.**

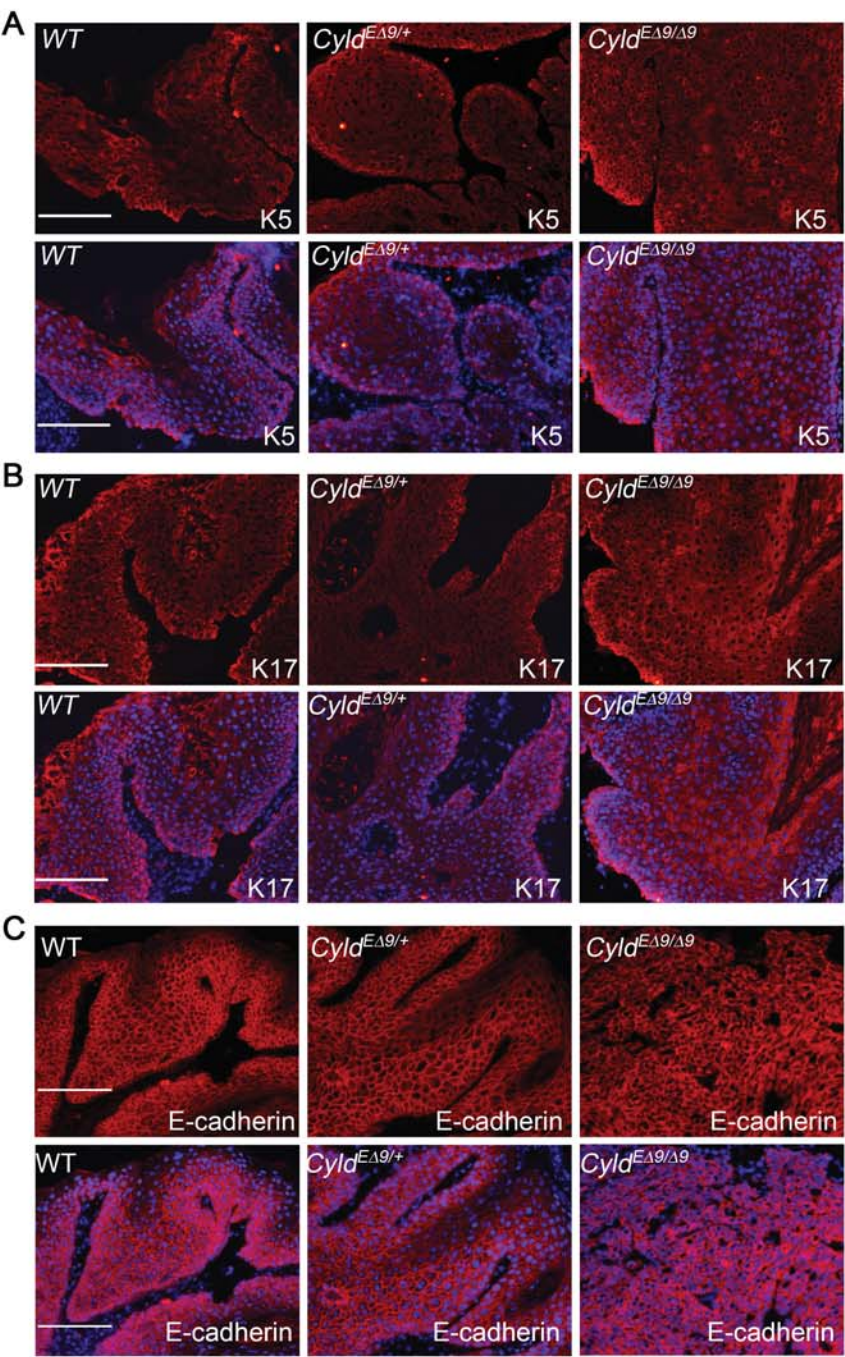

**Supplementary Figure S8. Expression of CDK4,  $\beta$ -catenin and Gli1 in tumors induced on *Cyld*<sup>E $\Delta$ 9/ $\Delta$ 9</sup> and control mice.**

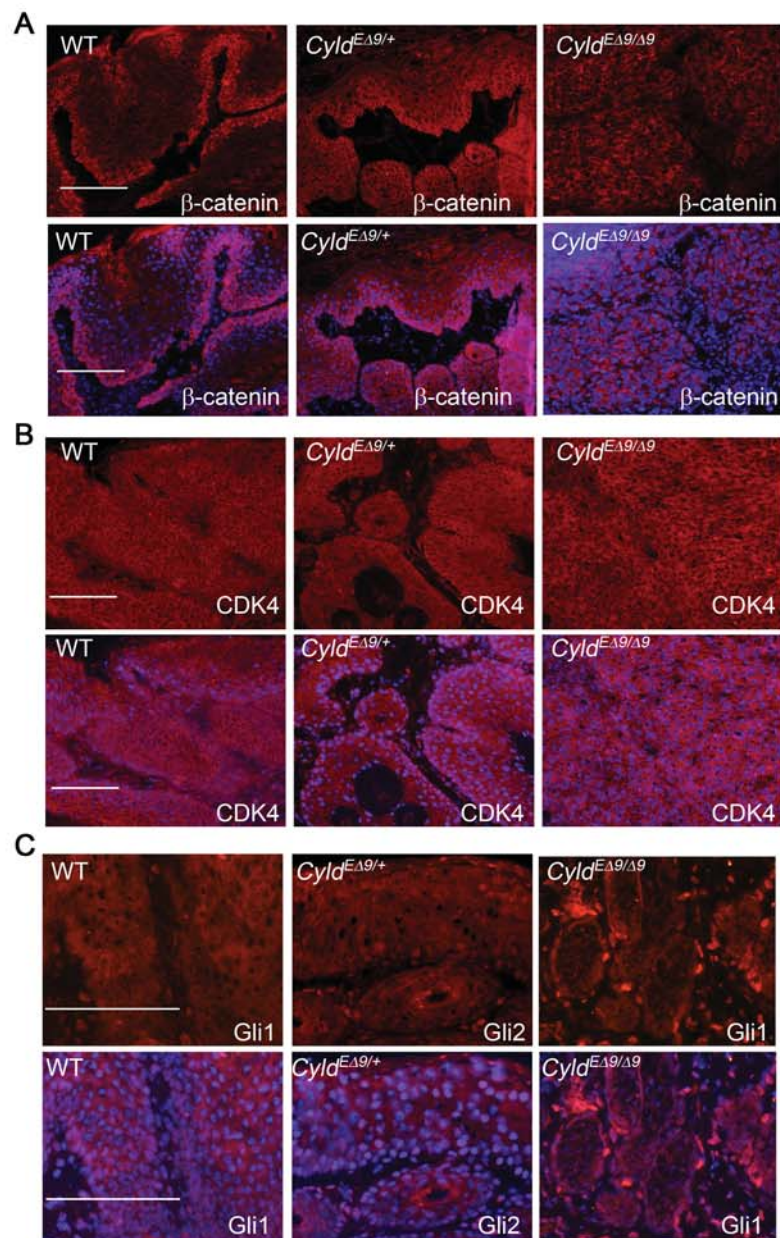

**Supplementary Figure S9. Expression of  $\beta$ -Catenin and CDK4 in WT and mutant mouse skin.**

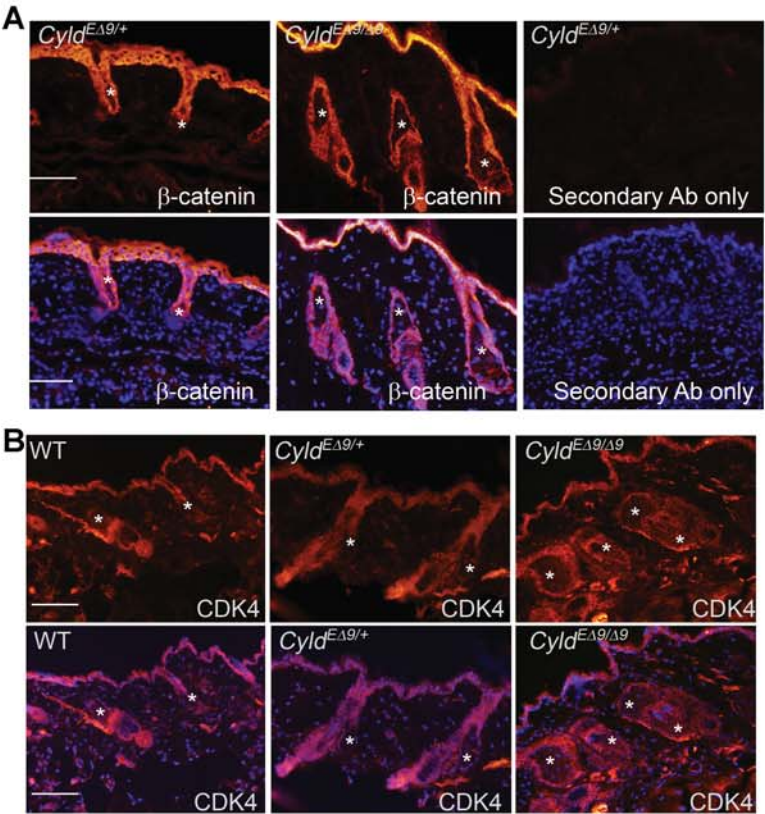

Supplement: jciinsight-1-86548-s001.pdf [file jciinsight-1-86548-s001.pdf]
